# Supplementary material for: An improved chromatographic method for separation of Re and PGE mass fractions in organic-rich geological samples
Source: Royal Society of Chemistry journal article supplement (doi:10.1039/d3ja00418j), 2024-01-01
Supplement: d3ja00418j1.pdf [file d3ja00418j1.pdf]

## **An improved chromatographic method for separation of Re- PGE mass fractions in organic-rich geological samples**

An-Ping Zou<sup>a,b,c</sup>, Zhu-Yin Chu<sup>\*a,b</sup>, Meng-Jie Wang<sup>a</sup> and Peng Peng<sup>a,b,c</sup>

<sup>a</sup> State Key Laboratory of Lithospheric Evolution, Institute of Geology and Geophysics, Chinese Academy of Sciences, Beijing 100029, China

<sup>b</sup> Innovation Academy for Earth Science, Chinese Academy of Sciences, Beijing 100029, China

<sup>c</sup> College of Earth and Planetary Sciences, University of Chinese Academy of Sciences, Beijing 100049, China

\*Corresponding author: State Key Laboratory of Lithospheric Evolution, Institute of Geology and Geophysics, Chinese Academy of Sciences, Beijing 100029, China  
E-mail: zhychu@mail.iggcas.ac.cn

**Table S1** Comparison of the analytical results of Re-Os for USGS SBC-1

| Sample                         | Re(ppb) | SE    | Os(ppb) | SE      | <sup>187</sup> Re/ <sup>188</sup> Os | SE  | <sup>187</sup> Os/ <sup>188</sup> Os | SE     |
|--------------------------------|---------|-------|---------|---------|--------------------------------------|-----|--------------------------------------|--------|
| <b>Cation exchange method*</b> |         |       |         |         |                                      |     |                                      |        |
| 1                              | 10.934  | 0.010 | 0.10744 | 0.00010 | 804.2                                | 1.3 | 5.0335                               | 0.0067 |
| 2                              | 10.913  | 0.010 | 0.10372 | 0.00010 | 850.5                                | 1.4 | 5.3206                               | 0.0073 |
| 3                              | 11.225  | 0.011 | 0.10558 | 0.00010 | 851.3                                | 1.4 | 5.2004                               | 0.0069 |
| 4                              | 10.980  | 0.010 | 0.10521 | 0.00010 | 836.7                                | 1.3 | 5.2161                               | 0.0069 |
| 5                              | 10.976  | 0.010 | 0.10452 | 0.00010 | 849.9                                | 1.4 | 5.3365                               | 0.0071 |
| 6                              | 11.167  | 0.010 | 0.10571 | 0.00010 | 842.3                                | 1.3 | 5.1474                               | 0.0070 |
| 7                              | 10.883  | 0.010 | 0.10310 | 0.00011 | 853.3                                | 1.4 | 5.3216                               | 0.0080 |
| 8                              | 10.871  | 0.010 | 0.10388 | 0.00010 | 839.9                                | 1.4 | 5.2292                               | 0.0072 |
| <b>Mean</b>                    | 10.99   |       | 0.1049  |         | 841                                  |     | 5.23                                 |        |
| <b>SD</b>                      | 0.13    |       | 0.0014  |         | 16                                   |     | 0.10                                 |        |
| <b>Anion exchange method**</b> |         |       |         |         |                                      |     |                                      |        |
| 1                              | 10.929  | 0.015 | 0.10516 | 0.00033 | 847.6                                | 4.6 | 5.436                                | 0.028  |
| 2                              | 10.947  | 0.015 | 0.10656 | 0.00033 | 828.8                                | 4.4 | 5.296                                | 0.026  |
| 3                              | 10.860  | 0.096 | 0.10284 | 0.00021 | 857.5                                | 8.1 | 5.380                                | 0.018  |
| 4                              | 10.932  | 0.022 | 0.10391 | 0.00015 | 815.0                                | 2.2 | 4.7854                               | 0.0089 |
| 5                              | 10.908  | 0.020 | 0.09969 | 0.00023 | 862.9                                | 2.7 | 5.008                                | 0.018  |
| <b>Mean</b>                    | 10.915  |       | 0.1036  |         | 842                                  |     | 5.18                                 |        |
| <b>SD</b>                      | 0.034   |       | 0.0026  |         | 20                                   |     | 0.28                                 |        |

\*The sample was analyzed for Re-Os with the newly developed method in this study;

\*\*The sample was analyzed for Re-Os with the method reported in Chu et al<sup>1</sup>, with which the anion exchange method was used for Re separation.

1. Z. Chu, Y. Yan, Z. Chen, J. Guo, Y. Yang, C. Li and Y. Zhang, *Geostand. Geoanal. Res.*, 2015, **39**, 151-169.
